# Supplementary material for: Leishmania donovani infection suppresses Allograft Inflammatory Factor-1 in monocytes and macrophages to inhibit inflammatory responses
Source: PubMed Central journal article supplement (PMC7807085; doi:10.1038/s41598-020-79068-6), 2021-01-13
Supplement: 41598_2020_79068_MOESM1_ESM.pdf [file 41598_2020_79068_MOESM1_ESM.pdf]

***Leishmania donovani* infection suppresses Allograft Inflammatory Factor-1 in monocytes and macrophages to inhibit inflammatory responses**

Ricardo L. da Silva<sup>1,2</sup>, Diana M. Elizondo<sup>1,3</sup>, Nailah Z. D. Brandy<sup>1</sup>, Naomi L. Haddock<sup>1,4</sup>, Thomas A. Boddie<sup>1</sup>, Lais Lima de Oliveira<sup>2</sup>, Amélia R. Jesus<sup>2</sup>, Roque P. Almeida<sup>2</sup>, Tatiana R. de Moura<sup>2</sup>, and Michael W. Lipscomb<sup>1</sup>

<sup>1</sup>Department of Biology, Howard University, Washington, DC, USA

<sup>2</sup>Laboratory of Immunology and Molecular Biology, Federal University of Sergipe, Aracaju, Brazil

<sup>3</sup>Department of Pediatrics and Communicable Diseases, Univ of Michigan Medical School, Ann Arbor, MI, USA

<sup>4</sup>Stanford Immunology, Stanford University, Stanford, CA USA.

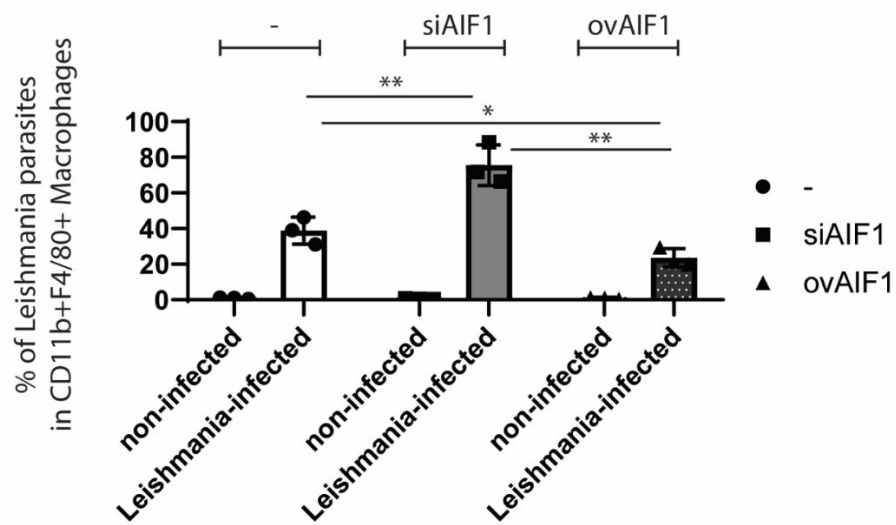

**Supplemental Figure 1.** Amount of *Leishmania Donovanii* in bone marrow-derived macrophages. Macrophages were either untreated (-), silenced for AIF1 (siAIF1), or overexpressed for AIF1 (ovAIF1) prior to being infected with CellTracker-stained *Leishmania donovani* at 5 parasites to 1 macrophage ratio. Next, percentage of CellTracker<sup>+</sup> *Leishmania* co-localized within CD11b<sup>+</sup>F4/80<sup>+</sup> macrophages was measured by flow cytometry after 48 h. Data represents 2 independent experiments by 3 replicates per group and presented as mean  $\pm$ SEM. Statistical significance was determined by unpaired t-test. \* = p<0.05 and \*\* = p<0.01.

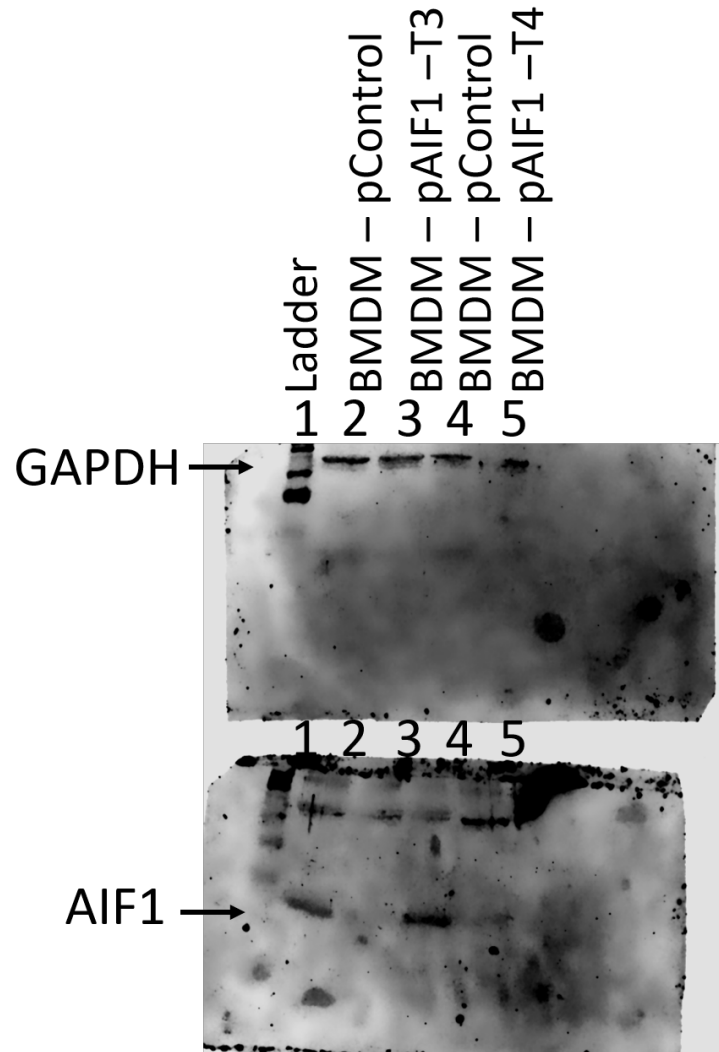

**Supplemental Figure 2.** Full length uncropped gel from Figure 4. Lane 1: Ladder. Lane 2-5: Bone marrow-derived macrophages for 6 days with M-CSF stimuli and transfected with either (2) pControl-T3-Scramble, (3) pAIF1-T3, (4) pControl-T4-Scramble or (5) pAIF1-T4. T3 and T4 have different gRNA targeting AIF1 gene exons.
